# Supplementary material for: Periodontal tissue regeneration by transplantation of autologous adipose tissue-derived multi-lineage progenitor cells
Source: PubMed Central journal article supplement (PMC9114023; doi:10.1038/s41598-022-11986-z), 2022-05-17
Supplement: 41598_2022_11986_MOESM1_ESM.pdf [file 41598_2022_11986_MOESM1_ESM.pdf]

## **Supporting Information Appendix S1**

### **Inclusion and exclusion criteria**

#### *Inclusion criteria*

Patients with a probing depth of 7 mm or more on the first visit.

Patients with a vertical bone defect in the interdental area (including either mesial or distal of the test tooth) that is at least 4-mm deep and 2-mm wide as determined by radiographic evaluation.

Patients who have completed the initial periodontal treatment at the time of reassessment.

Patients with less than 2° of mobility of the test tooth and the presence of keratinized gingiva for which flap surgery is indicated.

Patients with stable oral hygiene at the start of the study and after stem cell transplantation.

Patients over 20 years of age at the time of obtaining consent for the study.

Patients who agreed to participate in this clinical study.

#### *Exclusion criteria*

Patients with prosthetics or other devices that interfere with the accurate measurement of clinical attachment levels.

Patients with concomitant or pre-existing malignancy.

Patients with findings of malignancy or precancerous lesions in the oral cavity or suspected findings.

Patients who have used or will use bisphosphonates.

Patients in need of a procedure (surgical or prosthetic procedure) that will affect the evaluation of the site under this study.

Patients who are pregnant, breastfeeding, seeking to become pregnant, or who may become pregnant.

Patients with concomitant renal, hepatic or blood disorders.

Patients with a hemoglobin A1c of at least 6.5% on pre-registration clinical examination.

Patients with an active infection.

Patients with a history of alcoholism or drug addiction within six months prior to enrollment.

Patients with a psychiatric complication or presenting with symptoms of a psychiatric disorder.

Patients with positive HCV, HBs, ATLA, or HIV antibodies.

Patients who are deemed by the principal investigator to be inappropriate for participation in the study.

Supplemental Table.1 Cell number, viability and purity of transplanted ADMPC

| n=12                           |                    | Freezing | Thawing  | Transplantation |
|--------------------------------|--------------------|----------|----------|-----------------|
| Cell number(x10 <sup>6</sup> ) |                    | 7.2±2.4  | -        | 16.9±9.7        |
|                                |                    | 3.0      |          | 6.7             |
| Cell viability (%)             |                    | 96.4±1.3 | 89.1±4.3 | 94.2±3.1        |
|                                |                    | 70       | 50       | 70              |
| Purity                         | CD45 negative (%)  | 99.2±0.4 | -        | 99.2±0.6        |
|                                |                    | 70       |          | 70              |
|                                | CD105 positive (%) | 96.0±4.1 | -        | 96.8±1.3        |
|                                |                    | 70       |          | 70              |
|                                | CD166 positive (%) | 92.2±4.9 | -        | 96.3±1.3        |
|                                |                    | 70       |          | 70              |

Upper column indicates data (mean±SD), lower column indicates minimum threshold.

Supplemental Table2. Urine tests.

Urine protein (normal: -)

| No | Baseline | 1W | 1M | 3M | 9M |
|----|----------|----|----|----|----|
| 1  | -        | -  | -  | -  | +  |
| 2  | -        | -  | -  | -  | -  |
| 3  | -        | -  | -  | -  | -  |
| 4  | -        | -  | -  | -  | -  |
| 5  | -        | -  | -  | -  | -  |
| 6  | -        | -  | -  | -  | -  |
| 7  | -        | -  | -  | -  | -  |
| 8  | -        | -  | -  | -  | -  |
| 9  | -        | -  | -  | -  | -  |
| 10 | -        | -  | -  | -  | -  |
| 11 | -        | -  | -  | -  | -  |
| 12 | -        | a  | -  | -  | -  |

a; missing value due to patient matter

Urine sugar (normal: -)

| No | Baseline | 1W | 1M | 3M | 9M |
|----|----------|----|----|----|----|
| 1  | -        | -  | -  | -  | -  |
| 2  | -        | -  | -  | -  | -  |
| 3  | -        | -  | -  | -  | -  |
| 4  | -        | -  | -  | -  | -  |
| 5  | -        | -  | -  | -  | -  |
| 6  | -        | -  | -  | -  | -  |
| 7  | -        | -  | -  | -  | -  |
| 8  | -        | -  | -  | -  | -  |
| 9  | -        | -  | -  | -  | -  |
| 10 | -        | -  | -  | -  | -  |
| 11 | -        | -  | -  | -  | -  |
| 12 | -        | a  | -  | -  | -  |

a; missing value due to patient matter

Urobilinogen (EU/dL) (normal range:  $\leq 1.0$ )

| No | Baseline | 1W  | 1M  | 3M  | 9M  |
|----|----------|-----|-----|-----|-----|
| 1  | 0.1      | 0.1 | 0.1 | 0.1 | 1   |
| 2  | 0.1      | 0.1 | 0.1 | 0.1 | 0.1 |
| 3  | 0.1      | 0.1 | 0.1 | 0.1 | 0.1 |
| 4  | 0.1      | 0.1 | 0.1 | 0.1 | 0.1 |
| 5  | 0.1      | 0.1 | 0.1 | 0.1 | 0.1 |
| 6  | 0.1      | 0.1 | 0.1 | 0.1 | 0.1 |
| 7  | 0.1      | 0.1 | 0.1 | 0.1 | 0.1 |
| 8  | 0.1      | 0.1 | 0.1 | 0.1 | 0.1 |
| 9  | 0.1      | 0.1 | 0.1 | 0.1 | 0.1 |
| 10 | 0.1      | 0.1 | 0.1 | 0.1 | 0.1 |
| 11 | 0.1      | 0.1 | 0.1 | 0.1 | 0.1 |
| 12 | 0.1      | a   | 0.1 | 0.1 | 0.1 |

a; missing value due to patient matter

Urine occult blood (normal: -)

| No | Baseline | 1W | 1M | 3M  | 9M  |
|----|----------|----|----|-----|-----|
| 1  | -        | -  | -  | -   | +++ |
| 2  | -        | -  | -  | ±   | -   |
| 3  | -        | -  | -  | +++ | +   |
| 4  | +        | ±  | +  | +   | +   |
| 5  | -        | +  | ±  | +   | ±   |
| 6  | -        | ±  | ±  | -   | +   |
| 7  | +        | +  | +  | ++  | +   |
| 8  | +        | +  | +  | +   | +   |
| 9  | ++       | ±  | ++ | +   | +   |
| 10 | -        | -  | -  | -   | -   |
| 11 | ±        | ±  | ±  | ±   | -   |
| 12 | ±        | A  | -  | -   | -   |

a; missing value due to patient matter

Supplemental table 3. Blood tests.

Basophil (%) (normal range: 0-1)

| No | Baseline | 1W  | 1M  | 3M  | 9M  |
|----|----------|-----|-----|-----|-----|
| 1  | 0.9      | 0.9 | 0.8 | 0.9 | 0.8 |
| 2  | 0.5      | 0.5 | 0.6 | 0.7 | 0.8 |
| 3  | 0.4      | 0.5 | 0.4 | 0.5 | 0.5 |
| 4  | 0.8      | 0.9 | 0.6 | 0.6 | 0.5 |
| 5  | 0.5      | 0.4 | 1   | 0.9 | 0.5 |
| 6  | 1.1      | 1   | 0.8 | 0.9 | 0.9 |
| 7  | 0.9      | 0.6 | 0.9 | 0.8 | 0.4 |
| 8  | 0.4      | 0.4 | 0.2 | 0.2 | 0.2 |
| 9  | 0.9      | 0.8 | 0.6 | 0.5 | 0.8 |
| 10 | 0.4      | 1   | 0.7 | 0.3 | 0.2 |
| 11 | 1.4      | 1.3 | 1.4 | 1.2 | 0.9 |
| 12 | 0.3      | 0.4 | 0.5 | 0.4 | 0.4 |



Neutrophil (%) (normal range: 40-72)

| No | Baseline | 1W   | 1M   | 3M   | 9M   |
|----|----------|------|------|------|------|
| 1  | 63.5     | 60.5 | 65.4 | 64.5 | 64.5 |
| 2  | 65.4     | 55.3 | 55.1 | 57.9 | 63.0 |
| 3  | 62.9     | 52.3 | 52.2 | 49.5 | 65.7 |
| 4  | 57.4     | 59.1 | 54.9 | 67.8 | 58.2 |
| 5  | 49.1     | 57.9 | 50.1 | 54.2 | 59.1 |
| 6  | 55.3     | 51.2 | 56.2 | 47.2 | 47.1 |
| 7  | 72.7     | 76.6 | 74.6 | 71.9 | 73.0 |
| 8  | 45.1     | 47.4 | 60.8 | 53.6 | 56.3 |
| 9  | 54.8     | 54.5 | 56.3 | 61.9 | 56.4 |
| 10 | 70.1     | 73.0 | 72.6 | 63.4 | 66.5 |
| 11 | 58.1     | 60.8 | 55.5 | 64.2 | 63.8 |
| 12 | 53.4     | 44.0 | 53.8 | 57.3 | 49.4 |

Eosinophil (%) (normal range: 0-7)

| No | Baseline | 1W  | 1M  | 3M  | 9M  |
|----|----------|-----|-----|-----|-----|
| 1  | 3.1      | 2.7 | 2.0 | 3.0 | 2.8 |
| 2  | 3.2      | 4.2 | 3.4 | 2.9 | 2.8 |
| 3  | 2.0      | 2.8 | 2.0 | 3.3 | 2.1 |
| 4  | 3.0      | 3.7 | 3.4 | 2.9 | 3.7 |
| 5  | 2.7      | 2.9 | 2.4 | 3.4 | 3.1 |
| 6  | 3.8      | 2.5 | 2.6 | 3.6 | 1.6 |
| 7  | 1.0      | 1.2 | 1.9 | 1.0 | 1.1 |
| 8  | 1.3      | 1.9 | 1.0 | 2.9 | 1.0 |
| 9  | 2.7      | 2.3 | 2.3 | 1.9 | 3.6 |
| 10 | 2.5      | 2.5 | 2.4 | 2.4 | 1.8 |
| 11 | 4.0      | 3.3 | 5.0 | 2.1 | 2.2 |
| 12 | 4.2      | 6.6 | 4.2 | 5.2 | 2.6 |

Monocyte (%) (normal range: 0-12)

| No | Baseline | 1W   | 1M   | 3M  | 9M   |
|----|----------|------|------|-----|------|
| 1  | 7.5      | 6.9  | 7.0  | 6.0 | 8.6  |
| 2  | 6.7      | 5.1  | 7.4  | 6.1 | 5.4  |
| 3  | 7.9      | 10.1 | 9.9  | 8.9 | 7.1  |
| 4  | 6.3      | 7.9  | 6.3  | 5.4 | 5.9  |
| 5  | 11.5     | 9.1  | 10.6 | 9.4 | 8.5  |
| 6  | 9.6      | 9.0  | 9.9  | 9.7 | 12.2 |
| 7  | 6.4      | 6.4  | 6.6  | 7.9 | 6.4  |
| 8  | 7.1      | 7.4  | 5.0  | 5.7 | 7.1  |
| 9  | 6.7      | 7.8  | 7.6  | 5.8 | 7.1  |
| 10 | 5.0      | 5.0  | 4.4  | 5.4 | 6.5  |
| 11 | 8.0      | 10.6 | 6.1  | 6.9 | 7.2  |
| 12 | 5.4      | 10.2 | 6.2  | 8.5 | 6.4  |

Lymphocyte (%) (normal range:27-47)

| No | Baseline | 1W   | 1M   | 3M   | 9M   |
|----|----------|------|------|------|------|
| 1  | 25.0     | 29.0 | 24.8 | 25.6 | 23.3 |
| 2  | 24.2     | 34.9 | 33.5 | 32.4 | 28.0 |
| 3  | 26.8     | 34.3 | 35.5 | 37.8 | 24.6 |
| 4  | 32.5     | 28.4 | 34.8 | 23.3 | 31.7 |
| 5  | 36.2     | 29.7 | 35.9 | 32.1 | 28.8 |
| 6  | 30.2     | 36.3 | 30.5 | 38.6 | 38.2 |
| 7  | 19.0     | 15.2 | 16.0 | 18.4 | 19.1 |
| 8  | 46.1     | 42.9 | 33.0 | 37.6 | 35.4 |
| 9  | 34.9     | 34.6 | 33.2 | 29.9 | 32.1 |
| 10 | 22.0     | 18.5 | 19.9 | 28.5 | 25.0 |
| 11 | 28.5     | 24.0 | 32.0 | 25.6 | 25.9 |
| 12 | 36.7     | 38.8 | 35.3 | 28.6 | 41.2 |

Hematocrit (%) (normal range: Male 40-48 Female 34-42)

| No | Baseline | 1W   | 1M   | 3M   | 9M   |
|----|----------|------|------|------|------|
| 1  | 40.5     | 39.3 | 38.2 | 42.1 | 36.3 |
| 2  | 38.9     | 38.6 | 39.9 | 40.1 | 39.0 |
| 3  | 47.7     | 47.3 | 46.7 | 46.0 | 49.0 |
| 4  | 41.4     | 40.3 | 40.4 | 41.8 | 41.3 |
| 5  | 42.5     | 43.4 | 43.7 | 43.3 | 44.4 |
| 6  | 46.3     | 47.8 | 47.9 | 39.9 | 46.5 |
| 7  | 40.4     | 40.7 | 41.3 | 39.5 | 41.0 |
| 8  | 38.2     | 39.9 | 40.1 | 39.0 | 38.8 |
| 9  | 43.1     | 43.4 | 42.9 | 43.0 | 44.7 |
| 10 | 39.2     | 39.3 | 40.0 | 39.2 | 41.0 |
| 11 | 36.0     | 36.6 | 37.1 | 36.3 | 38.0 |
| 12 | 41.6     | 41.2 | 39.1 | 40.7 | 40.8 |

Hemoglobin (g/dL) (normal range: Male 13-17 Female 12-16)

| No | Baseline | 1W   | 1M   | 3M   | 9M   |
|----|----------|------|------|------|------|
| 1  | 13.6     | 12.9 | 12.6 | 14.1 | 11.7 |
| 2  | 13.1     | 13.0 | 13.3 | 13.5 | 13.0 |
| 3  | 15.8     | 15.3 | 15.3 | 14.8 | 15.9 |
| 4  | 13.2     | 13.1 | 13.0 | 13.7 | 13.3 |
| 5  | 14.4     | 14.8 | 14.7 | 14.7 | 15.4 |
| 6  | 15.2     | 15.5 | 15.9 | 13.1 | 15.0 |
| 7  | 12.8     | 13.0 | 13.2 | 12.8 | 13.3 |
| 8  | 12.4     | 12.6 | 12.8 | 12.8 | 12.7 |
| 9  | 13.9     | 14.2 | 13.9 | 13.7 | 15.5 |
| 10 | 13.1     | 12.7 | 12.8 | 13.0 | 13.6 |
| 11 | 12.1     | 11.9 | 12.0 | 12.1 | 12.5 |
| 12 | 13.8     | 13.6 | 13.4 | 14.0 | 14.1 |

Leucocyte ( $10^3/\mu\text{L}$ ) (normal range:4-9)

| No | Baseline | 1W  | 1M  | 3M  | 9M  |
|----|----------|-----|-----|-----|-----|
| 1  | 6.9      | 6.0 | 7.1 | 7.8 | 7.3 |
| 2  | 6.5      | 5.0 | 5.1 | 6.4 | 6.3 |
| 3  | 5.7      | 4.8 | 5.1 | 5.2 | 5.8 |
| 4  | 5.6      | 4.8 | 4.9 | 6.7 | 5.3 |
| 5  | 6.4      | 6.8 | 6.7 | 8.3 | 6.2 |
| 6  | 5.3      | 5.4 | 5.9 | 5.8 | 4.2 |
| 7  | 5.5      | 5.8 | 8.0 | 6.1 | 6.6 |
| 8  | 3.6      | 4.3 | 4.3 | 4.0 | 4.9 |
| 9  | 4.3      | 4.9 | 5.3 | 5.6 | 6.1 |
| 10 | 7.7      | 5.9 | 6.9 | 7.2 | 6.6 |
| 11 | 5.6      | 5.0 | 5.2 | 6.8 | 6.4 |
| 12 | 4.5      | 4.9 | 5.5 | 5.6 | 5.5 |

Erythrocyte ( $10^6/\mu\text{L}$ ) (normal range: Male 4.0-5.3 Female 3.8-4.8)

| No | Baseline | 1W   | 1M   | 3M   | 9M   |
|----|----------|------|------|------|------|
| 1  | 4.68     | 4.48 | 4.44 | 4.83 | 4.25 |
| 2  | 4.38     | 4.32 | 4.51 | 4.54 | 4.42 |
| 3  | 5.18     | 5.04 | 5.10 | 4.97 | 5.27 |
| 4  | 4.55     | 4.35 | 4.42 | 4.59 | 4.53 |
| 5  | 4.56     | 4.73 | 4.72 | 4.68 | 4.82 |
| 6  | 5.09     | 5.24 | 5.32 | 4.44 | 5.07 |
| 7  | 4.27     | 4.31 | 4.34 | 4.17 | 4.32 |
| 8  | 4.29     | 4.42 | 4.49 | 4.33 | 4.32 |
| 9  | 4.65     | 4.74 | 4.67 | 4.59 | 5.00 |
| 10 | 4.13     | 3.95 | 4.04 | 3.96 | 4.15 |
| 11 | 3.90     | 4.00 | 4.01 | 3.88 | 4.09 |
| 12 | 4.56     | 4.52 | 4.29 | 4.52 | 4.57 |



Albumin (g/dL) (normal range: 4.1-5.1)

| No | Baseline | 1W  | 1M  | 3M  | 9M  |
|----|----------|-----|-----|-----|-----|
| 1  | 4.3      | 4.4 | 4.2 | 4.5 | 4.0 |
| 2  | 4.4      | 4.3 | 4.4 | 4.6 | 4.2 |
| 3  | 4.2      | 3.9 | 4.2 | 4.0 | 4.4 |
| 4  | 4.4      | 4.3 | 4.4 | 4.4 | 4.5 |
| 5  | 4.0      | 4.3 | 4.2 | 4.2 | 4.3 |
| 6  | 4.7      | 4.9 | 5.0 | 4.4 | 4.7 |
| 7  | 4.6      | 4.5 | 4.7 | 4.6 | 4.6 |
| 8  | 4.3      | 4.2 | 4.4 | 4.3 | 4.2 |
| 9  | 4.8      | 5.1 | 4.6 | 4.3 | 4.8 |
| 10 | 4.4      | 4.1 | 4.3 | 4.3 | 4.6 |
| 11 | 4.2      | 3.9 | 4.1 | 4.0 | 4.2 |
| 12 | 4.2      | 4.1 | 4.2 | 4.2 | 4.4 |

HbA1c (%) (normal range: 4.6-6.2)

| No | Baseline | 1W  | 1M  | 3M  | 9M  |
|----|----------|-----|-----|-----|-----|
| 1  | 5.3      | 5.3 | 5.2 | 5.4 | 5.4 |
| 2  | 5.3      | 5.5 | 5.3 | 5.5 | 4.9 |
| 3  | 7.0 a    | 7.2 | 7.1 | 6.7 | 6.3 |
| 4  | 5.6      | 5.5 | 5.7 | 6.0 | 6.0 |
| 5  | 5.6      | 5.6 | 5.6 | 5.6 | 5.6 |
| 6  | 5.3      | 5.5 | 5.5 | 5.8 | 5.7 |
| 7  | 5.2      | 5.2 | 5.2 | 5.2 | 5.1 |
| 8  | 5.6      | 5.6 | 5.5 | 5.9 | 5.5 |
| 9  | 5.0      | 5.1 | 5.2 | 4.9 | 5.2 |
| 10 | 5.2      | 5.3 | 5.2 | 5.3 | 4.9 |
| 11 | 5.5      | 5.5 | 5.6 | 5.5 | 5.4 |
| 12 | 5.0      | 5.1 | 5.1 | 4.9 | 4.9 |

a: HbA1c of patient 3 at screening was 6.4%

Glucose (mg/dL) (normal range: 73-109)

| No | Baseline | 1W  | 1M  | 3M  | 9M  |
|----|----------|-----|-----|-----|-----|
| 1  | 84       | 94  | 89  | 90  | 95  |
| 2  | 94       | 91  | 93  | 95  | 93  |
| 3  | 127      | 143 | 126 | 114 | 123 |
| 4  | 101      | 107 | 111 | 97  | 106 |
| 5  | 81       | 95  | 96  | 90  | 90  |
| 6  | 96       | 115 | 106 | 90  | 100 |
| 7  | 93       | 70  | 100 | 90  | 101 |
| 8  | 97       | 88  | 97  | 97  | 97  |
| 9  | 90       | 93  | 104 | 93  | 96  |
| 10 | 107      | 100 | 98  | 95  | 97  |
| 11 | 86       | 74  | 75  | 85  | 75  |
| 12 | 95       | 104 | 96  | 99  | 98  |

Total Protein (g/dL) (normal range: 6.6-8.1)

| No | Baseline | 1W  | 1M  | 3M  | 9M  |
|----|----------|-----|-----|-----|-----|
| 1  | 7.7      | 7.6 | 7.3 | 7.9 | 7.6 |
| 2  | 7.2      | 7.1 | 7.1 | 7.4 | 6.7 |
| 3  | 7.2      | 7.0 | 7.2 | 7.0 | 7.8 |
| 4  | 7.0      | 6.8 | 7.0 | 7.6 | 7.3 |
| 5  | 6.4      | 6.9 | 6.8 | 6.8 | 6.8 |
| 6  | 7.9      | 8.2 | 8.2 | 7.3 | 8.2 |
| 7  | 7.6      | 7.3 | 7.4 | 7.4 | 7.3 |
| 8  | 7.1      | 7.2 | 7.3 | 7.2 | 7.0 |
| 9  | 7.2      | 7.7 | 6.8 | 6.7 | 7.5 |
| 10 | 7.3      | 7.1 | 7.2 | 7.4 | 7.6 |
| 11 | 6.8      | 6.7 | 6.9 | 6.7 | 7.0 |
| 12 | 7.2      | 7.1 | 6.9 | 7.0 | 7.3 |

Total bilirubin (mg/dL) (normal range: 0.4-1.5)

| No | Baseline | 1W  | 1M  | 3M  | 9M  |
|----|----------|-----|-----|-----|-----|
| 1  | 0.6      | 0.6 | 0.6 | 0.7 | 0.7 |
| 2  | 0.6      | 0.8 | 0.9 | 1.0 | 0.8 |
| 3  | 1.3      | 1.2 | 2.0 | 1.1 | 1.4 |
| 4  | 0.7      | 0.8 | 0.8 | 0.8 | 0.6 |
| 5  | 0.8      | 0.7 | 0.7 | 0.8 | 0.8 |
| 6  | 0.7      | 0.9 | 0.7 | 0.7 | 0.4 |
| 7  | 0.8      | 0.5 | 0.8 | 0.6 | 0.7 |
| 8  | 0.6      | 0.4 | 0.5 | 0.8 | 0.6 |
| 9  | 1.3      | 1.4 | 1.3 | 0.9 | 1.8 |
| 10 | 0.8      | 0.4 | 0.6 | 0.7 | 0.7 |
| 11 | 0.6      | 0.6 | 0.6 | 0.8 | 1.2 |
| 12 | 0.7      | 0.8 | 1.0 | 1.1 | 0.7 |

Total cholesterol (mg/dL) (normal range: 142-248)

| No | Baseline | 1W  | 1M  | 3M  | 9M  |
|----|----------|-----|-----|-----|-----|
| 1  | 267      | 252 | 263 | 297 | 272 |
| 2  | 222      | 235 | 240 | 246 | 225 |
| 3  | 150      | 140 | 158 | 115 | 133 |
| 4  | 201      | 207 | 212 | 233 | 220 |
| 5  | 116      | 113 | 117 | 122 | 130 |
| 6  | 287      | 291 | 301 | 265 | 252 |
| 7  | 163      | 147 | 163 | 146 | 145 |
| 8  | 170      | 164 | 174 | 175 | 172 |
| 9  | 238      | 243 | 217 | 205 | 241 |
| 10 | 191      | 167 | 177 | 182 | 179 |
| 11 | 225      | 210 | 224 | 213 | 218 |
| 12 | 151      | 164 | 166 | 167 | 172 |

LDH (U/L) (normal range: 124-222)

| No | Baseline | 1W  | 1M  | 3M  | 9M  |
|----|----------|-----|-----|-----|-----|
| 1  | 207      | 210 | 214 | 209 | 193 |
| 2  | 184      | 180 | 189 | 179 | 184 |
| 3  | 214      | 204 | 202 | 222 | 192 |
| 4  | 199      | 217 | 193 | 208 | 203 |
| 5  | 161      | 180 | 177 | 170 | 182 |
| 6  | 168      | 173 | 190 | 162 | 181 |
| 7  | 159      | 148 | 164 | 150 | 164 |
| 8  | 210      | 200 | 222 | 211 | 202 |
| 9  | 177      | 175 | 160 | 173 | 182 |
| 10 | 215      | 206 | 196 | 187 | 211 |
| 11 | 143      | 122 | 137 | 125 | 135 |
| 12 | 154      | 154 | 145 | 142 | 154 |

ALP (U/L) (normal range: 106-322)

| No | Baseline | 1W  | 1M  | 3M  | 9M  |
|----|----------|-----|-----|-----|-----|
| 1  | 293      | 310 | 294 | 255 | 280 |
| 2  | 217      | 200 | 209 | 205 | 194 |
| 3  | 274      | 303 | 271 | 248 | 259 |
| 4  | 204      | 194 | 206 | 223 | 180 |
| 5  | 158      | 202 | 257 | 188 | 216 |
| 6  | 141      | 156 | 157 | 122 | 155 |
| 7  | 153      | 186 | 160 | 161 | 159 |
| 8  | 225      | 283 | 296 | 234 | 241 |
| 9  | 103      | 106 | 107 | 104 | 103 |
| 10 | 249      | 280 | 269 | 264 | 285 |
| 11 | 148      | 163 | 168 | 139 | 125 |
| 12 | 134      | 137 | 124 | 123 | 135 |



CRP (mg/dL) (normal range:  $\leq 0.14$ )

| No | Baseline | 1W   | 1M   | 3M   | 9M   |
|----|----------|------|------|------|------|
| 1  | 0.49     | 0.42 | 0.37 | 0.43 | 4.85 |
| 2  | 0.19     | 0.15 | 0.14 | 0.14 | 0.14 |
| 3  | 0.14     | 0.34 | 0.14 | 0.14 | 0.20 |
| 4  | 0.14     | 0.16 | 0.14 | 0.14 | 0.14 |
| 5  | 0.14     | 0.14 | 0.14 | 0.14 | 0.14 |
| 6  | 0.14     | 0.14 | 0.14 | 0.14 | 0.56 |
| 7  | 0.14     | 0.14 | 0.14 | 0.14 | 0.14 |
| 8  | 0.14     | 0.14 | 0.14 | 0.14 | 0.14 |
| 9  | 0.14     | 0.14 | 0.14 | 0.14 | 0.14 |
| 10 | 0.14     | 0.46 | 0.14 | 0.14 | 0.14 |
| 11 | 0.14     | 0.14 | 0.14 | 0.14 | 0.14 |
| 12 | 0.14     | 0.14 | 0.14 | 0.14 | 0.14 |

Na (mEq/L) (normal range: 138-145)

| No | Baseline | 1W  | 1M  | 3M  | 9M  |
|----|----------|-----|-----|-----|-----|
| 1  | 143      | 142 | 140 | 141 | 139 |
| 2  | 143      | 140 | 140 | 141 | 140 |
| 3  | 142      | 143 | 141 | 143 | 143 |
| 4  | 142      | 143 | 141 | 143 | 142 |
| 5  | 143      | 142 | 141 | 138 | 141 |
| 6  | 141      | 141 | 142 | 143 | 140 |
| 7  | 141      | 139 | 138 | 140 | 142 |
| 8  | 142      | 144 | 145 | 145 | 143 |
| 9  | 142      | 142 | 143 | 142 | 141 |
| 10 | 144      | 143 | 143 | 146 | 143 |
| 11 | 140      | 140 | 144 | 141 | 141 |
| 12 | 144      | 142 | 142 | 139 | 142 |

K (mEq/L) (normal range: 3.6-4.8)

| No | Baseline | 1W  | 1M  | 3M  | 9M  |
|----|----------|-----|-----|-----|-----|
| 1  | 3.7      | 3.7 | 4.1 | 4.0 | 4.0 |
| 2  | 4.2      | 4.4 | 3.9 | 3.8 | 4.0 |
| 3  | 4.2      | 4.4 | 4.3 | 4.2 | 4.2 |
| 4  | 3.8      | 4.0 | 3.9 | 4.1 | 4.2 |
| 5  | 4.4      | 4.5 | 4.7 | 4.0 | 4.4 |
| 6  | 4.0      | 3.8 | 4.1 | 3.7 | 4.2 |
| 7  | 3.6      | 3.6 | 3.7 | 3.6 | 3.9 |
| 8  | 4.9      | 4.8 | 4.1 | 3.6 | 4.1 |
| 9  | 4.0      | 4.0 | 4.3 | 4.4 | 4.4 |
| 10 | 3.8      | 4.2 | 3.9 | 4.0 | 4.3 |
| 11 | 4.1      | 4.0 | 3.9 | 4.1 | 3.9 |
| 12 | 4.2      | 3.7 | 3.9 | 4.2 | 3.9 |

Cl (mEq/L) (normal range: 101-108)

| No | Baseline | 1W  | 1M  | 3M  | 9M  |
|----|----------|-----|-----|-----|-----|
| 1  | 104      | 104 | 104 | 102 | 105 |
| 2  | 107      | 105 | 104 | 105 | 106 |
| 3  | 107      | 108 | 106 | 110 | 105 |
| 4  | 104      | 105 | 103 | 104 | 106 |
| 5  | 104      | 104 | 104 | 101 | 105 |
| 6  | 104      | 101 | 104 | 105 | 101 |
| 7  | 104      | 103 | 103 | 105 | 105 |
| 8  | 107      | 108 | 110 | 107 | 109 |
| 9  | 105      | 105 | 105 | 105 | 105 |
| 10 | 106      | 106 | 106 | 108 | 106 |
| 11 | 103      | 104 | 107 | 104 | 104 |
| 12 | 107      | 105 | 106 | 105 | 107 |

BUN (mg/dL) (normal range: 8.0-20.0)

| No | Baseline | 1W   | 1M   | 3M   | 9M   |
|----|----------|------|------|------|------|
| 1  | 10.6     | 10.6 | 14.0 | 9.8  | 12.6 |
| 2  | 11.4     | 8.2  | 9.7  | 10.7 | 11.6 |
| 3  | 9.9      | 13.2 | 13.0 | 11.2 | 14.7 |
| 4  | 15.2     | 20.0 | 18.4 | 18.0 | 15.5 |
| 5  | 14.2     | 13.5 | 14.5 | 12.3 | 17.4 |
| 6  | 10.0     | 11.8 | 12.1 | 10.3 | 11.3 |
| 7  | 14.9     | 15.8 | 11.2 | 15.9 | 13.5 |
| 8  | 17.6     | 21.2 | 15.7 | 16.1 | 15.8 |
| 9  | 13.7     | 14.9 | 12.5 | 14.1 | 13.8 |
| 10 | 15.0     | 15.5 | 15.3 | 15.1 | 16.3 |
| 11 | 18.6     | 18.4 | 18.6 | 17.9 | 16.5 |
| 12 | 9.3      | 8.2  | 10.8 | 9.9  | 10.1 |

Creatinine (mg/dL) (normal range: Male 0.65-1.07 Female 0.46-0.79)

| No | Baseline | 1W  | 1M  | 3M  | 9M  |
|----|----------|-----|-----|-----|-----|
| 1  | 0.6      | 0.7 | 0.7 | 0.8 | 0.7 |
| 2  | 0.6      | 0.6 | 0.6 | 0.5 | 0.5 |
| 3  | 1.0      | 1.1 | 1.1 | 1.0 | 1.1 |
| 4  | 0.7      | 0.7 | 0.7 | 0.7 | 0.8 |
| 5  | 0.9      | 0.9 | 0.9 | 0.9 | 1.0 |
| 6  | 0.5      | 0.5 | 0.5 | 0.6 | 0.6 |
| 7  | 0.5      | 0.6 | 0.5 | 0.6 | 0.6 |
| 8  | 0.7      | 0.6 | 0.7 | 0.7 | 0.6 |
| 9  | 0.5      | 0.6 | 0.5 | 0.5 | 0.6 |
| 10 | 0.7      | 0.7 | 0.7 | 0.7 | 0.8 |
| 11 | 0.6      | 0.6 | 0.6 | 0.6 | 0.6 |
| 12 | 0.6      | 0.6 | 0.6 | 0.6 | 0.6 |

Uric acid (mg/dL) (normal range: Male 3.7-7.8 Female 2.6-5.5)

| No | Baseline | 1W  | 1M  | 3M  | 9M  |
|----|----------|-----|-----|-----|-----|
| 1  | 6.3      | 6.1 | 6.6 | 6.5 | 6.8 |
| 2  | 3.4      | 3.6 | 3.5 | 3.2 | 3.4 |
| 3  | 5.2      | 5.5 | 5.9 | 5.2 | 5.4 |
| 4  | 4.2      | 4.3 | 4.1 | 4.2 | 3.9 |
| 5  | 7.9      | 7.2 | 8.2 | 7.2 | 8.7 |
| 6  | 4.8      | 5.4 | 4.5 | 4.7 | 4.3 |
| 7  | 3.9      | 4.7 | 4.0 | 4.6 | 4.6 |
| 8  | 5.3      | 4.7 | 4.7 | 4.6 | 4.1 |
| 9  | 2.4      | 2.9 | 2.9 | 2.8 | 2.7 |
| 10 | 4.3      | 3.9 | 4.8 | 4.2 | 4.9 |
| 11 | 3.8      | 3.4 | 3.2 | 3.8 | 3.4 |
| 12 | 3.7      | 3.8 | 3.8 | 3.8 | 4.2 |

AST (U/L) (normal range: 13-30)

| No | Baseline | 1W | 1M | 3M | 9M |
|----|----------|----|----|----|----|
| 1  | 22       | 38 | 25 | 21 | 31 |
| 2  | 14       | 15 | 15 | 15 | 14 |
| 3  | 53       | 48 | 43 | 36 | 31 |
| 4  | 31       | 26 | 26 | 27 | 23 |
| 5  | 34       | 29 | 29 | 30 | 31 |
| 6  | 25       | 25 | 26 | 21 | 29 |
| 7  | 20       | 19 | 20 | 22 | 21 |
| 8  | 20       | 19 | 22 | 24 | 18 |
| 9  | 14       | 16 | 12 | 10 | 12 |
| 10 | 31       | 29 | 29 | 23 | 23 |
| 11 | 15       | 14 | 14 | 12 | 14 |
| 12 | 18       | 17 | 15 | 15 | 17 |



ALT (U/L) (normal range: Male 10-42 Female 7-23)

| No | Baseline | 1W | 1M | 3M | 9M |
|----|----------|----|----|----|----|
| 1  | 27       | 37 | 36 | 19 | 34 |
| 2  | 9        | 11 | 11 | 11 | 9  |
| 3  | 84       | 71 | 63 | 47 | 39 |
| 4  | 41       | 26 | 26 | 25 | 22 |
| 5  | 37       | 33 | 31 | 33 | 29 |
| 6  | 23       | 24 | 32 | 21 | 23 |
| 7  | 11       | 10 | 10 | 11 | 11 |
| 8  | 12       | 12 | 13 | 12 | 12 |
| 9  | 11       | 10 | 10 | 10 | 9  |
| 10 | 28       | 33 | 26 | 21 | 20 |
| 11 | 15       | 14 | 14 | 11 | 14 |
| 12 | 11       | 11 | 10 | 9  | 12 |

CPK (U/L) (normal range: Male 59-248 Female 41-153)

| No | Baseline | 1W  | 1M  | 3M  | 9M  |
|----|----------|-----|-----|-----|-----|
| 1  | 92       | 97  | 116 | 92  | 79  |
| 2  | 77       | 81  | 103 | 79  | 65  |
| 3  | 98       | 93  | 114 | 105 | 154 |
| 4  | 110      | 163 | 101 | 93  | 112 |
| 5  | 266      | 263 | 179 | 245 | 209 |
| 6  | 80       | 94  | 102 | 64  | 79  |
| 7  | 91       | 86  | 103 | 88  | 98  |
| 8  | 112      | 130 | 136 | 116 | 118 |
| 9  | 64       | 82  | 59  | 65  | 63  |
| 10 | 269      | 196 | 160 | 116 | 168 |
| 11 | 70       | 57  | 85  | 46  | 62  |
| 12 | 53       | 44  | 45  | 43  | 50  |

Supplemental table 4. Individual data of PD reduction, CAL gain and new bone formation.

| No | PD reduction (mm) |    |    | CAL gain (mm) |    |    | new bone formation (%) |       |       |        |
|----|-------------------|----|----|---------------|----|----|------------------------|-------|-------|--------|
|    | 3M                | 6M | 9M | 3M            | 6M | 9M | 1M                     | 3M    | 6M    | 9M     |
| 1  | 3                 | 4  | 4  | 2             | 2  | 2  | 22.94                  | 38.21 | 49.64 | 107.96 |
| 2  | 5                 | 5  | 5  | 4             | 4  | 4  | 21.03                  | 21.37 | 20.27 | 21.00  |
| 3  | 3                 | 3  | 3  | 2             | 2  | 2  | 12.51                  | 31.09 | 51.89 | 75.55  |
| 4  | 3                 | 3  | 3  | 3             | 3  | 3  | 2.05                   | 16.09 | 26.83 | 33.61  |
| 5  | 3                 | 3  | 3  | 3             | 3  | 3  | 1.13                   | 49.58 | 73.67 | 84.72  |
| 6  | 3                 | 4  | 4  | 3             | 5  | 5  | -15.31                 | 6.98  | 29.45 | 73.68  |
| 7  | 3                 | 3  | 3  | 3             | 2  | 2  | 24.41                  | 13.82 | 19.56 | 11.88  |
| 8  | 4                 | 5  | 5  | 4             | 4  | 4  | 0.00                   | 24.65 | 72.65 | 74.05  |
| 9  | 2                 | 2  | 2  | 1             | 1  | 1  | 8.24                   | 29.16 | 27.88 | 36.93  |
| 10 | 2                 | 2  | 3  | 1             | 1  | 2  | 15.77                  | 16.37 | -4.57 | 22.80  |
| 11 | 4                 | 8  | 8  | 3             | 7  | 7  | 11.65                  | 21.48 | 21.84 | 32.81  |
| 12 | 0                 | 1  | 1  | 0             | 1  | 1  | 2.69                   | 6.98  | 11.24 | 14.54  |
